# Supplementary figures and images for: Metabolic Adaptation as Potential Target in Papillary Renal Cell Carcinomas Based on Their In Situ Metabolic Characteristics
Source: MDPI journal article supplement (doi:10.3390/ijms231810587), 2022-09-13

Figure S1. Additional information to WES Analysis

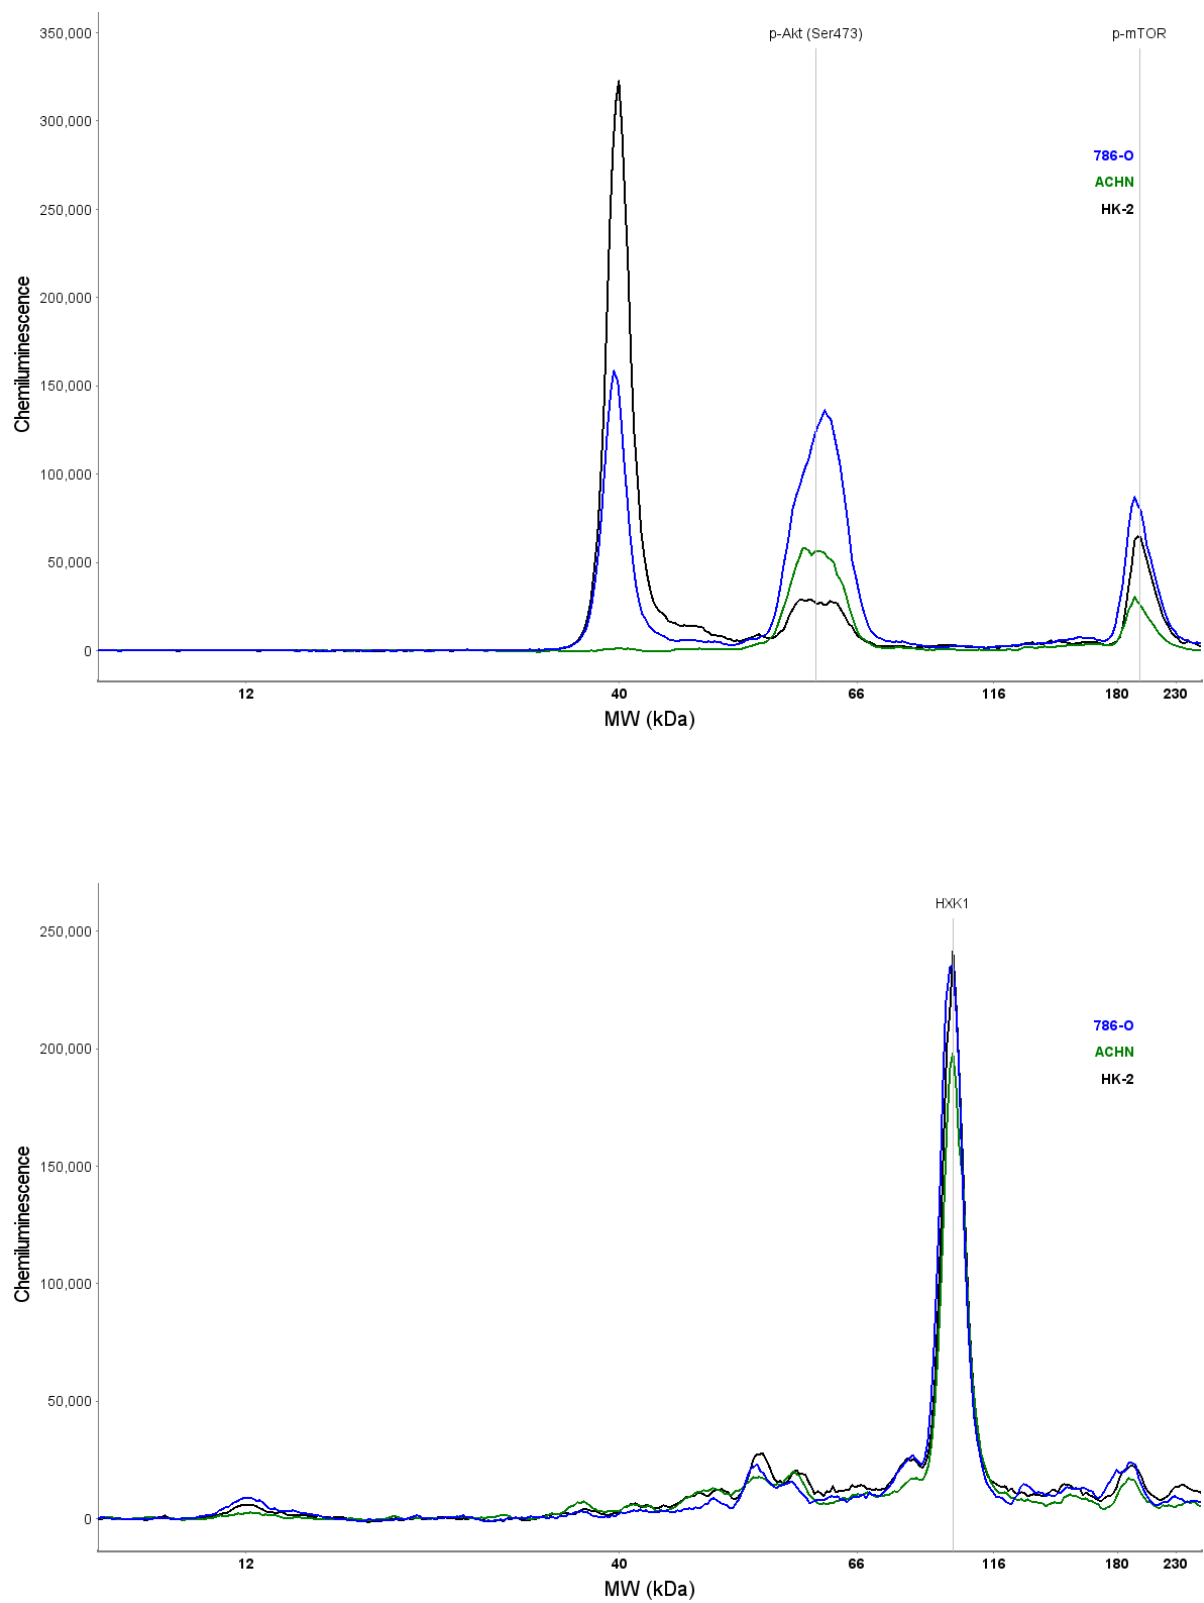

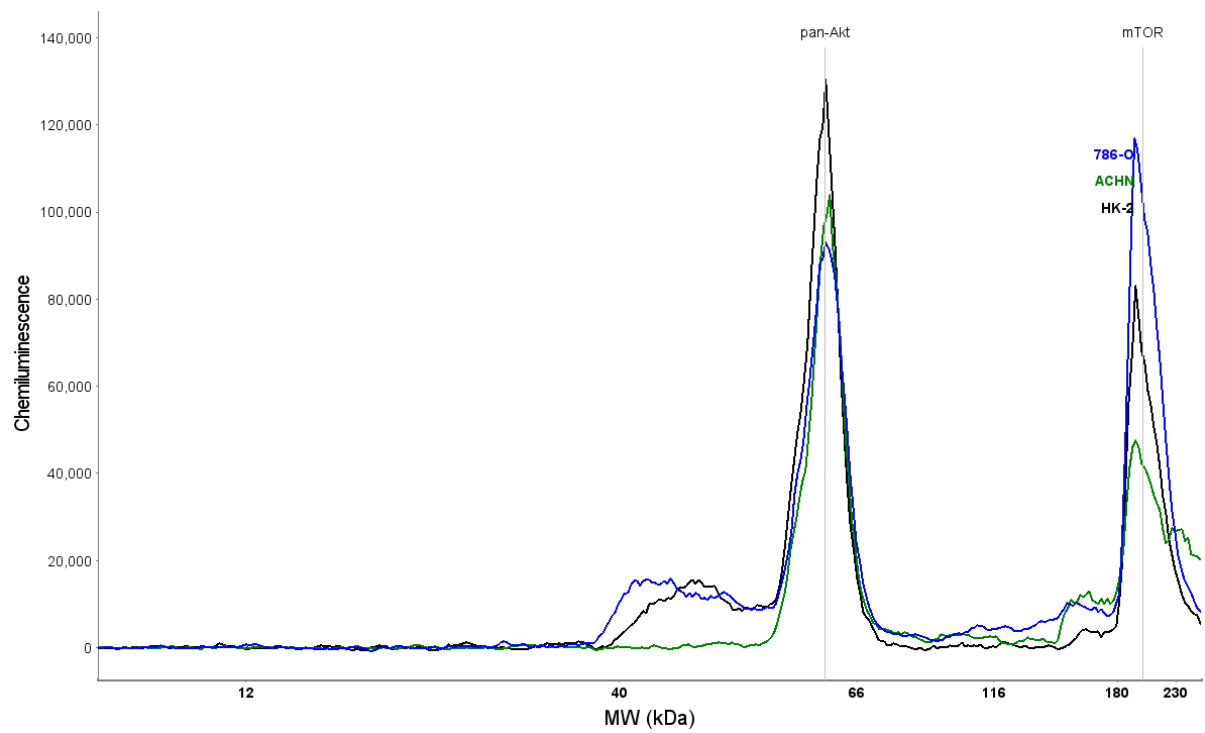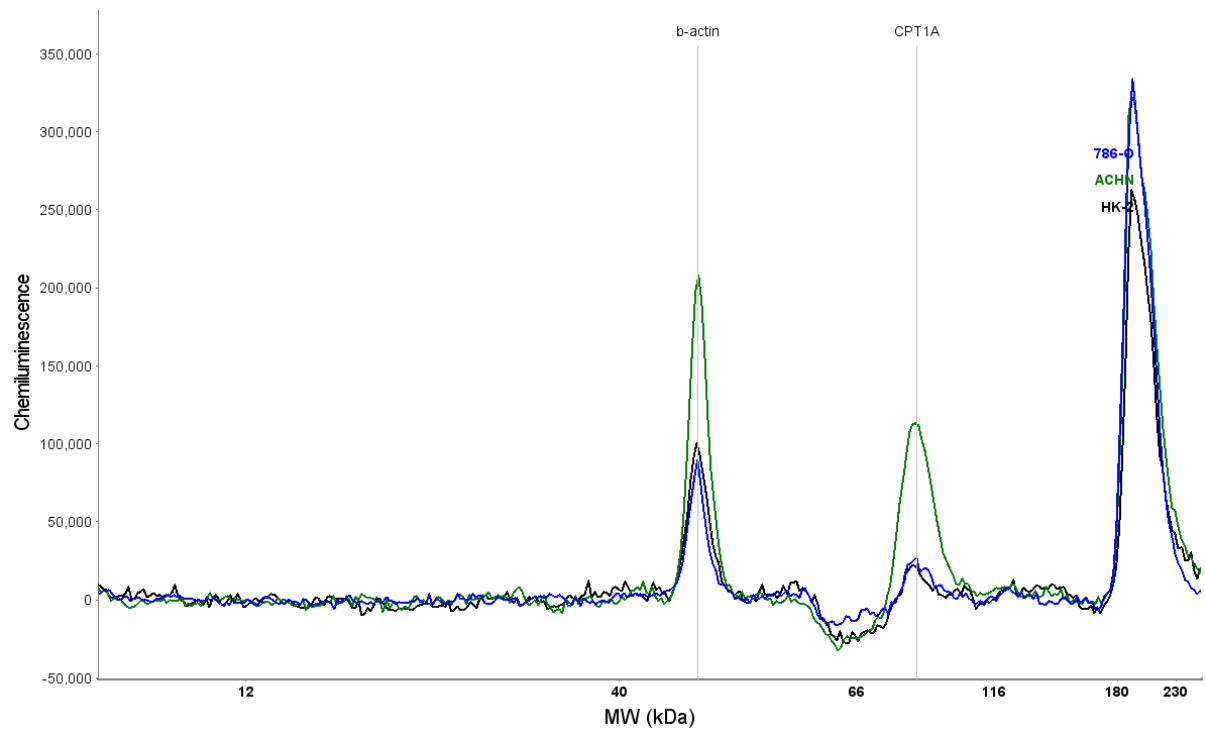

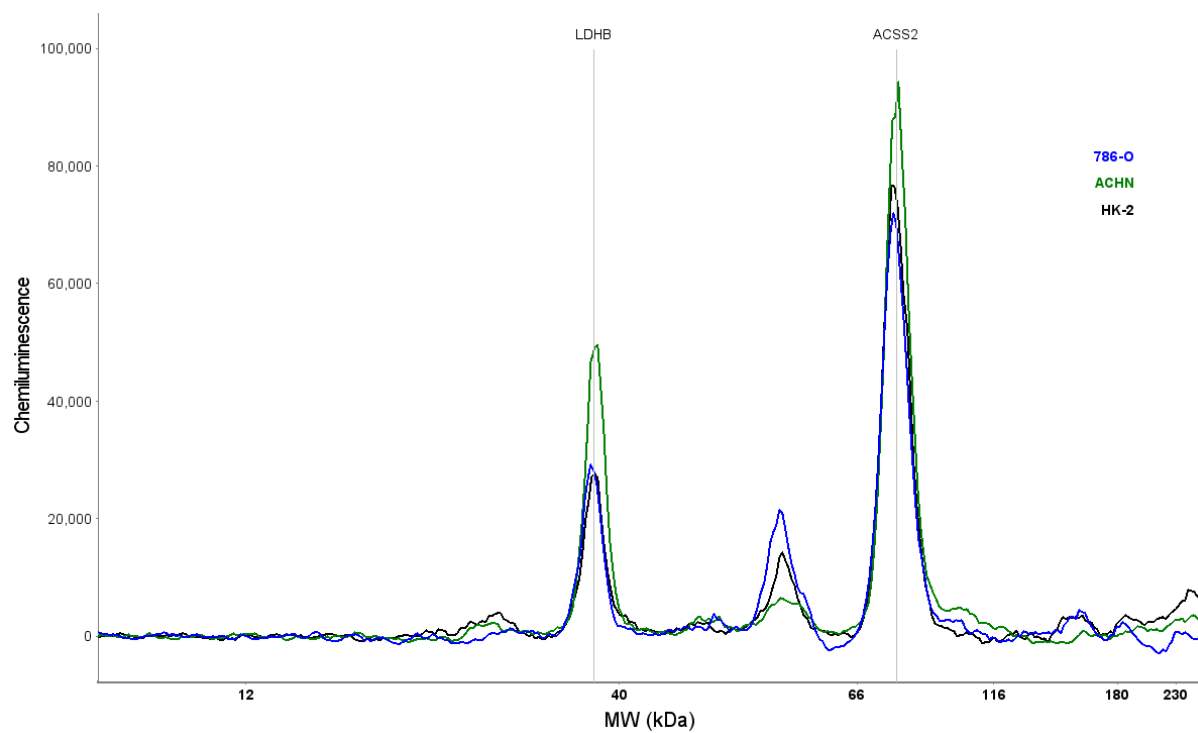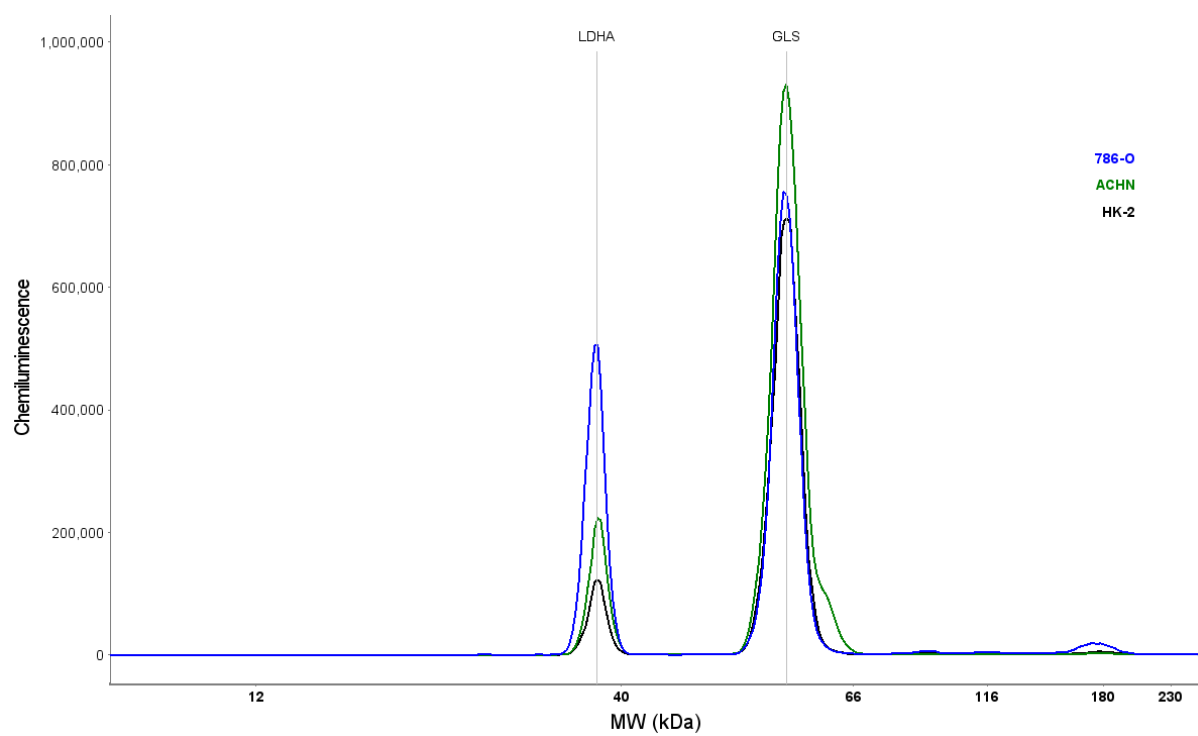

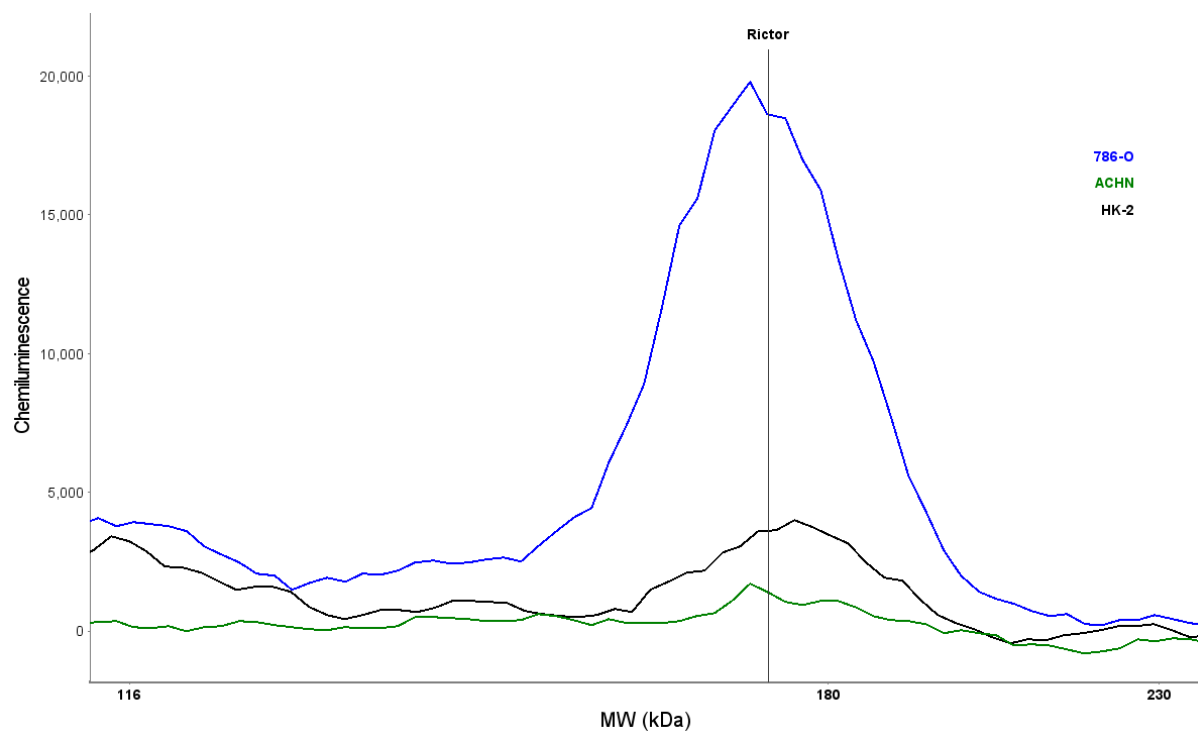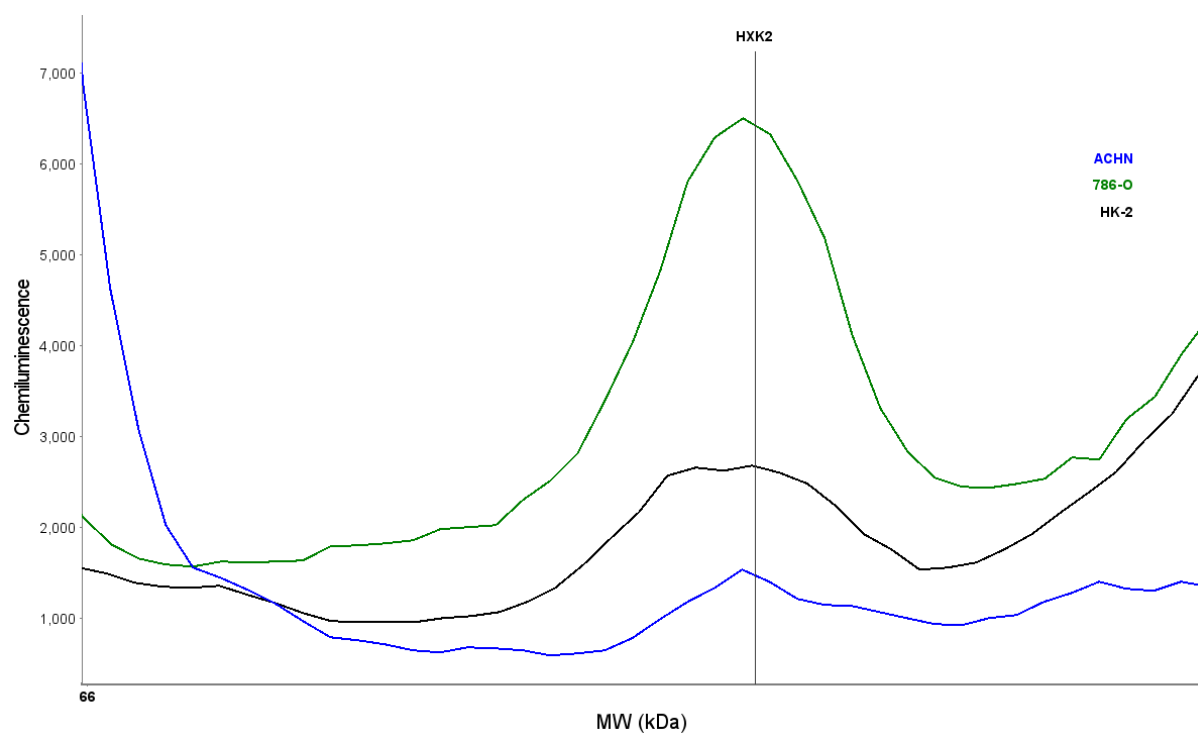

Supplement: s1 [file s1]
